# Supplementary material for: PLOD2-driven IL-6/STAT3 signaling promotes the invasion and metastasis of oral squamous cell carcinoma via activation of integrin β1
Source: PubMed Central journal article supplement — Int J Oncol. 2021 Apr 16;58(6):29. doi: 10.3892/ijo.2021.5209 (PMC8057293; doi:10.3892/ijo.2021.5209), 2021-04-16
Supplement: Supplementary_Data.pdf [file Supplementary_Data.pdf]

Figure S1. STR loci in Ca9-22 cell lines. The identical signals for STR of Ca9-22 cells in the present study are indicated. The assay was evaluated from 10 different STR loci (TH01, D21S11, D5S818, D13S317, D7S820, D16S539, CSF1PO, AMEL, vWA and TPOX). STR, short tandem repeat.

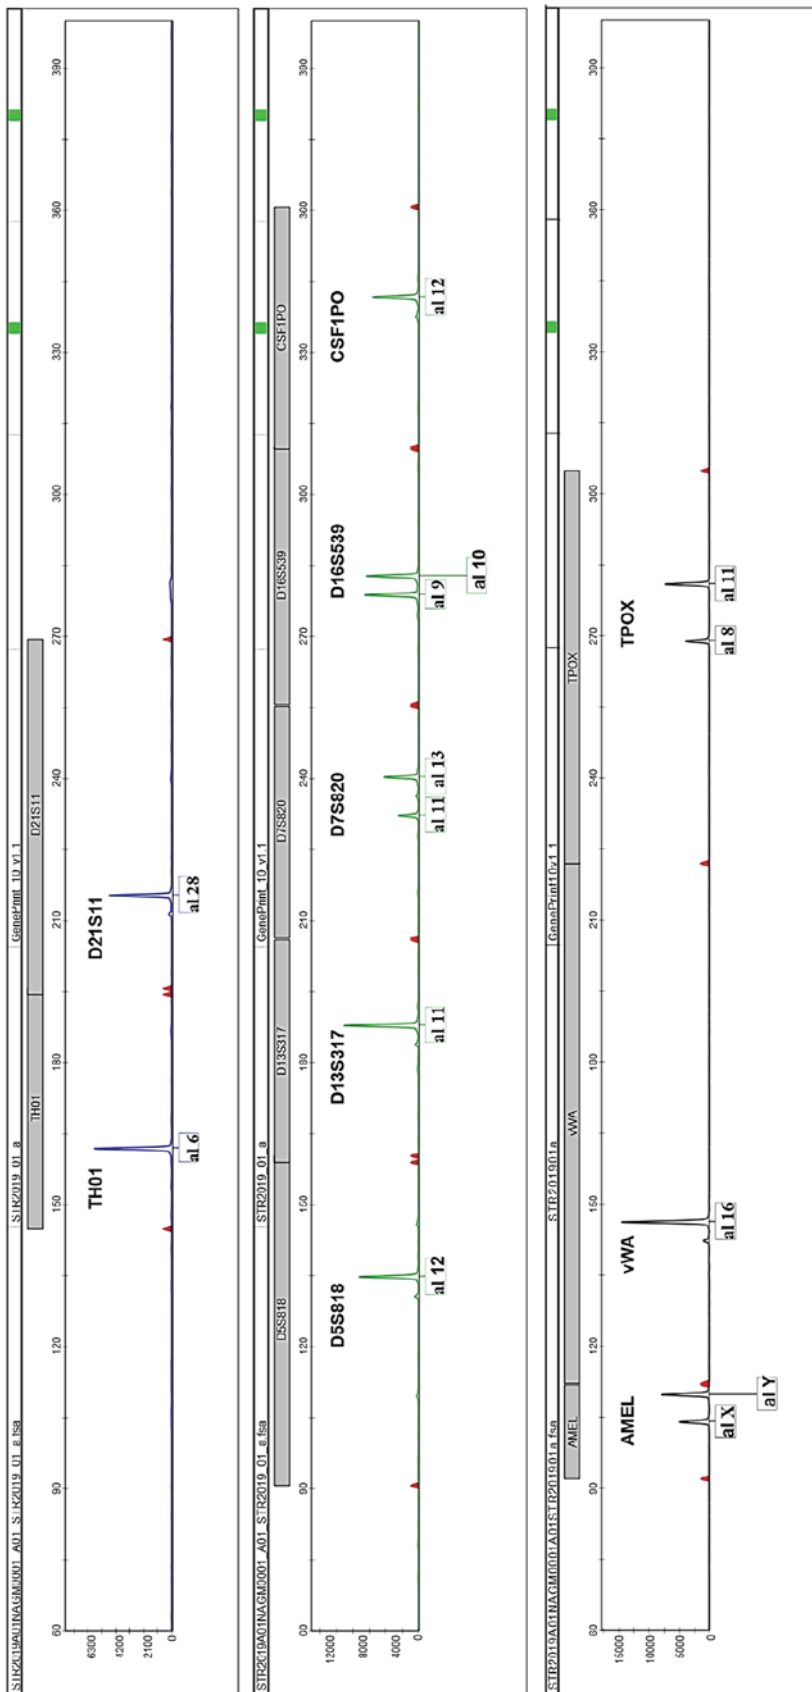

Figure S2. Migration of oral cancer cells in response to IL-6. (A) siPLOD2-transfected oral cancer cells (HSC-2, HSC-3 and Ca9-22, green fluorescence protein-positive cells) were seeded in the COL-I-coated plate. Cell migration with IL-6 treatment (0.5 ng/ml) was detected with a wound healing assay using a 24-well plate. Images were taken 0 and 12 h after wound formation (scale bar, 400  $\mu$ m). (B) The wound width was estimated using fluorescence microscopic images. Results are presented as the mean  $\pm$  SD (n=3). \*P<0.05, \*\*P<0.01 vs. siControl + IL-6 group. IL-, interleukin; PLOD2, procollagen-lysine 2-oxoglutarate 5-dioxygenase 2; si, small interfering RNA.

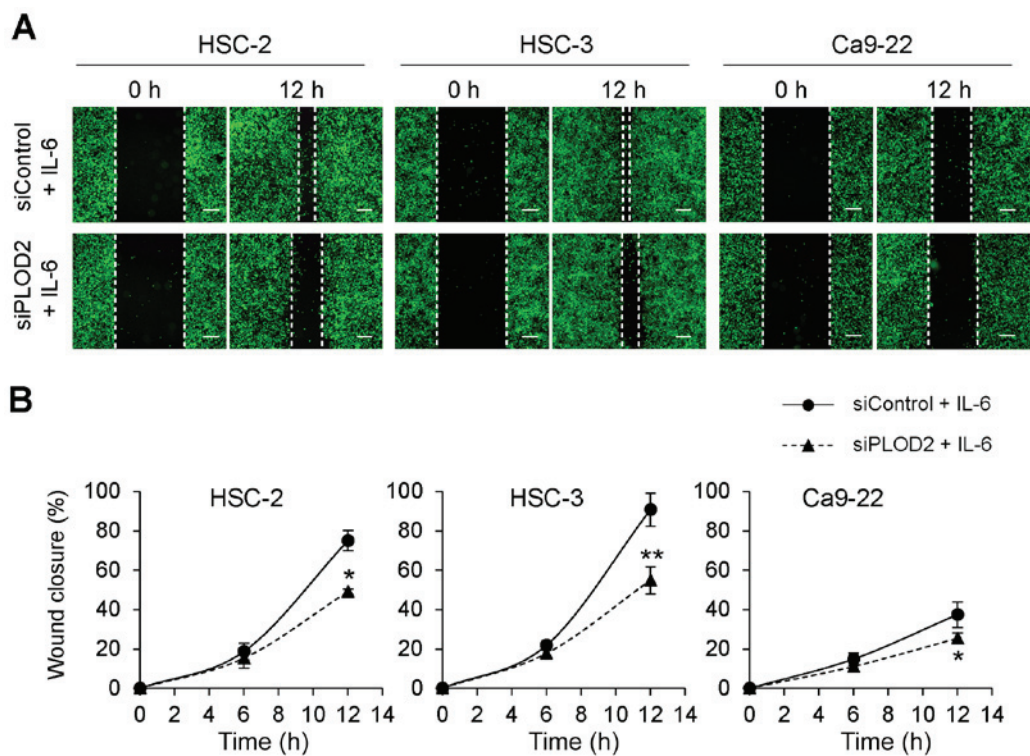

Table SI. STR profiles of oral cancer cell lines.

| STR marker        | Cell lines                                             |                                                        |                                                      |                    |                    |                              |                    |                      |
|-------------------|--------------------------------------------------------|--------------------------------------------------------|------------------------------------------------------|--------------------|--------------------|------------------------------|--------------------|----------------------|
|                   | Ca9-22 <sup>a</sup>                                    | Ca9-22 <sup>b</sup>                                    | HSC-2 <sup>a</sup>                                   | HSC-2 <sup>b</sup> | HSC-2 <sup>c</sup> | HSC-3 <sup>a</sup>           | HSC-3 <sup>b</sup> | MSK-922 <sup>d</sup> |
| AMEL              | X, Y                                                   | X, Y                                                   | X, Y                                                 | X                  | X, Y               | X, Y                         | X, Y               | X, X                 |
| TH01              | 6                                                      | 6                                                      | 6, 7                                                 | 6, 7               | 6, 7               | 6, 9.3                       | 6, 9.3             | 8, 8                 |
| D5S818            | 12                                                     | 12                                                     | 10, 12                                               | 10, 12             | 10, 12             | 11, 13                       | 11, 13             | 11, 11               |
| D13S317           | 11                                                     | 11                                                     | 11, 12                                               | 11, 12             | 11, 12             | 12                           | 12                 | 12, 12               |
| D7S820            | 11, 13                                                 | 11, 13                                                 | 9, 12                                                | 9, 12              | 9, 12              | 13                           | 13                 | 11, 11               |
| D16S539           | 9, 10                                                  | 9, 10                                                  | 12                                                   | 12                 | 12                 | 9                            | 9                  | 9, 11                |
| CSF1PO            | 12                                                     | 12                                                     | 12, 13                                               | 12, 13             | 12, 13             | 11                           | 11                 | 10, 12               |
| vWA               | 16                                                     | 16                                                     | 16, 18                                               | 16, 18             | 16, 18             | 14, 17                       | 14, 17             | 17, 17               |
| TPOX              | 8, 11                                                  | 8, 11                                                  | 8                                                    | 8                  | 8                  | 8                            | 8                  | 8, 8                 |
| E.V. <sup>e</sup> | 1.00 (Ca9-22 <sup>a</sup><br>vs. Ca9-22 <sup>b</sup> ) | 1.00 (HSC-2 <sup>a</sup><br>vs. HSC-2 <sup>b,c</sup> ) | 1.00 (HSC-3 <sup>a</sup><br>vs. HSC-3 <sup>b</sup> ) | -                  | -                  | -                            | -                  | -                    |
|                   | 0.30 (Ca9-22 <sup>a</sup><br>vs. MSK-922)              | 0.20 (HSC-2 <sup>a</sup><br>vs. MSK-922)               | 0.37 (HSC-3 <sup>a</sup><br>vs. MSK-922)             | -                  | -                  | -                            | -                  | -                    |
| Others            | Used in the<br>present study                           | ID,<br>JCRB0625                                        | Used in the<br>present study                         | ID,<br>JCRB0622    | ID,<br>RCB1945     | Used in the<br>present study | ID,<br>JCRB0623    | (23)                 |

The number of repeat units at each STR marker is indicated. Homozygous alleles are shown as one value, and heterozygous alleles are shown as two values, which corresponds to one or two peaks in the STR electropherogram, respectively. <sup>a</sup>Used in present study; <sup>b</sup>STR profiles from JCRB cell bank; <sup>c</sup>STR profiles from RIKEN bioresource research center; <sup>d</sup>Information from Zhao *et al* (29); <sup>e</sup>Evaluation Value = 2 x number of shared alleles/(number of query alleles + number of reference alleles). STR, short tandem repeat; X, X chromosome; Y, Y chromosome; JCRB, Japanese Collection of Research Bioresources; -, not applicable.
